# Supplementary material for: A fluorescence “turn-on” chemosensor for Hg2+and Ag+based on NBD (7-nitrobenzo-2-oxa-1,3-diazolyl)
Source: Royal Society of Chemistry journal article supplement (doi:10.1039/c6ra25585j), 2017-01-01
Supplement: c6ra25585j1.pdf [file c6ra25585j1.pdf]

## Supporting Information

### **A fluorescence “turn-on” chemosensor for Hg<sup>2+</sup> and Ag<sup>+</sup> based on NBD (7-nitrobenzo-2-oxa-1,3-diazolyl)**

Seong Youl Lee, Kwon Hee Bok, Cheal Kim\*

*Department of Fine Chemistry and Department of Interdisciplinary Bio IT Materials, Seoul National University of Science and Technology, Seoul 139-743, Korea. Fax: +82-2-973-9149; Tel: +82-2-970-6693; E-mail: chealkim@seoultech.ac.kr*

**Table S1.** Examples of chemosensors for simultaneous detection of Hg<sup>2+</sup> and Ag<sup>+</sup>.

| Sensor                                                                              | Detection limit (Hg <sup>2+</sup> /Ag <sup>+</sup> , μM) | Binding constant (Hg <sup>2+</sup> /Ag <sup>+</sup> , M <sup>-1</sup> ) | Percent of water in solution (%) | Method of detection (Hg <sup>2+</sup> /Ag <sup>+</sup> ) | Reference |
|-------------------------------------------------------------------------------------|----------------------------------------------------------|-------------------------------------------------------------------------|----------------------------------|----------------------------------------------------------|-----------|
| 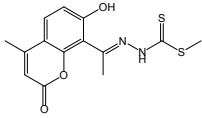   | 0.29 / 0.4                                               | 2.3 x 10 <sup>4</sup> / 5.1 x 10 <sup>4</sup>                           | 50                               | Fluorescence                                             | 1         |
|    | 140 / 650                                                | No data                                                                 | 15                               | Fluorescence, Colorimetric                               | 2         |
|    | 0.21 / 0.009                                             | 2.2 x 10 <sup>4</sup> / No data                                         | 40                               | Fluorescence                                             | 3         |
|    | 0.25 / No data                                           | 7.4 x 10 <sup>8</sup> / No data                                         | 80                               | Fluorescence                                             | 4         |
|   | No data                                                  | 1.0 x 10 <sup>9</sup> / 4.1 x 10 <sup>4</sup>                           | 0.5                              | Fluorescence                                             | 5         |
|  | 0.37 / 0.34                                              | 2.6 x 10 <sup>5</sup> / No data                                         | 67                               | Fluorescence                                             | 6         |
|  | 0.19 / 0.59                                              | 1.0 x 10 <sup>5</sup> / 9.4 x 10 <sup>4</sup>                           | 10                               | Fluorescence                                             | 7         |
|  | 0.13 / No data                                           | 3.1 x 10 <sup>7</sup> / 1.2 x 10 <sup>8</sup>                           | 50                               | Fluorescence, Colorimetric                               | 8         |
|  | 0.05 / 0.12                                              | 5.0 x 10 <sup>4</sup> / 3.5 x 10 <sup>4</sup>                           | 70                               | Fluorescence                                             | This work |

## References

- 1 H. El-Shekheby, A. H. Mangood, S. M. Hamza, A. S. Al-Kady and E.-Z. M. Ebeid, *Luminescence*, 2014, **29**, 158-167.
- 2 X. Zhang, Y. Xu, P. Guo and X. Qian, *New J. Chem.*, 2012, **36**, 1621-1625.
- 3 W. Shen, L. Wang, M. Wu and X. Bao, *Inorg. Chem. Commun.*, 2016, **70**, 107-110.
- 4 T. Chen, W. Zhu, Y. Xu, S. Zhang, X. Zhang and X. Qian, *Dalton Trans.*, 2010, **39**, 1316-1320.
- 5 X. Liu, X. Yang, H. Peng, C. Zhu and Y. Cheng, *Tetrahedron Lett.*, 2011, **52**, 2295-2298.
- 6 L. Liu, G. Zhang, J. Xiang, D. Zhang and D. Zhu, *Org. Lett.*, 2008, **10**, 4581-4584.
- 7 W. Shi, Y. Chen, X. Chen, Z. Xie and Y. Hui, *J. Lumin.*, 2016, **174**, 56-62.
- 8 J. Fan, C. Chen, Q. Lin and N. Fu, *Sens. Actuators B*, 2012, **173**, 874-881.

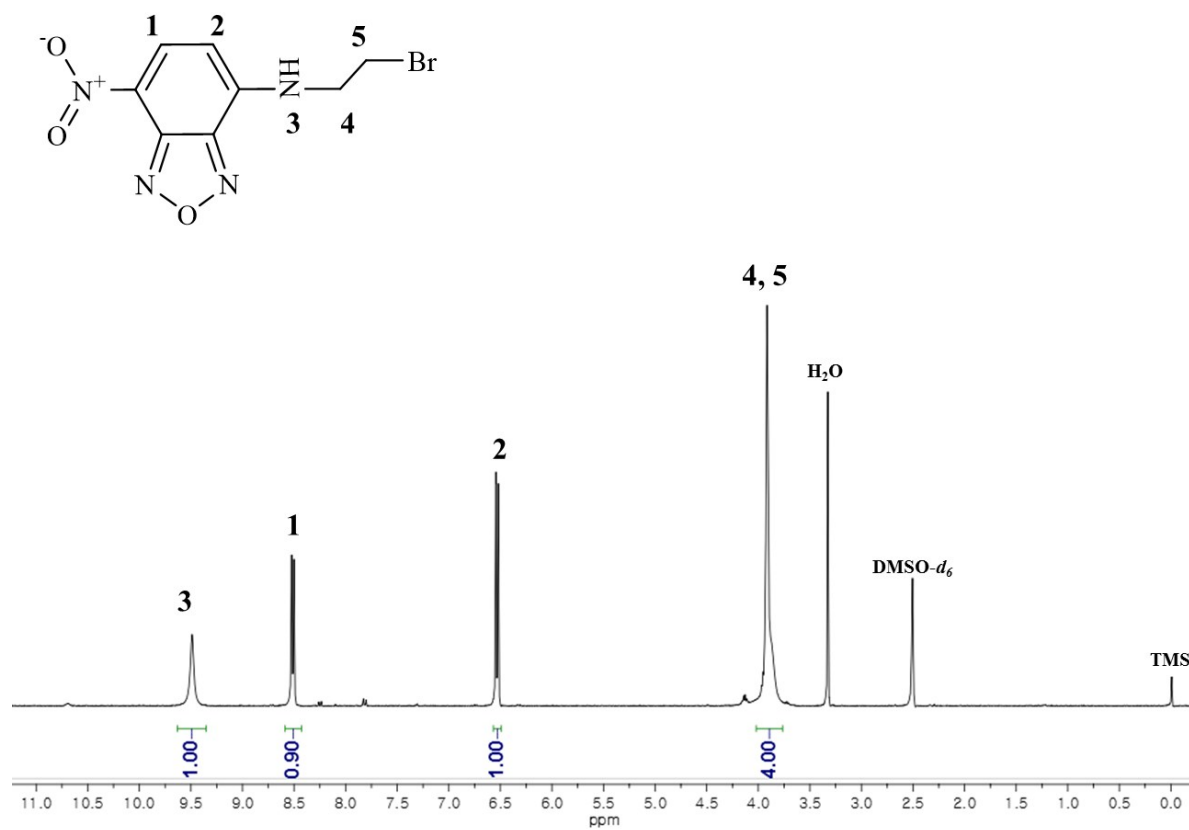

**Fig. S1**  $^1\text{H}$  NMR spectrum of **2**.

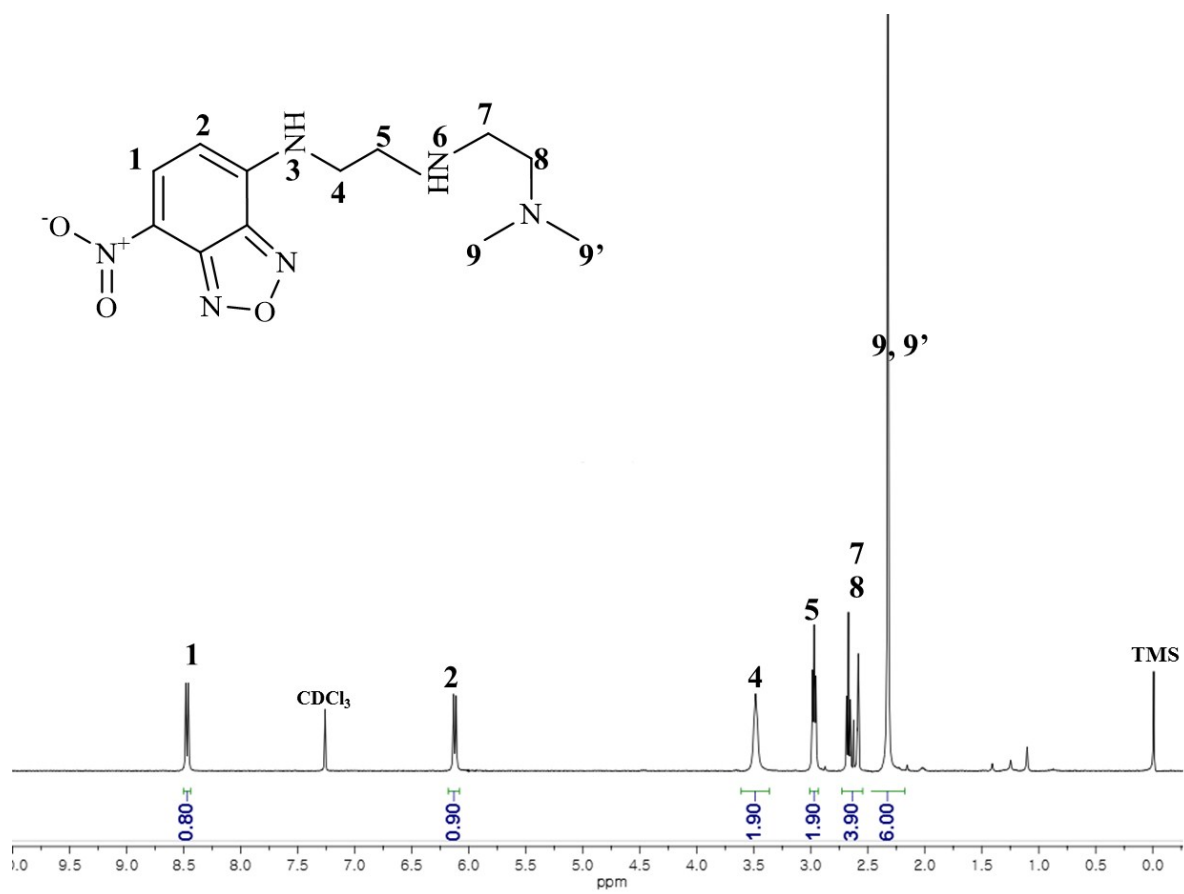

**Fig. S2** <sup>1</sup>H NMR spectrum of 1.

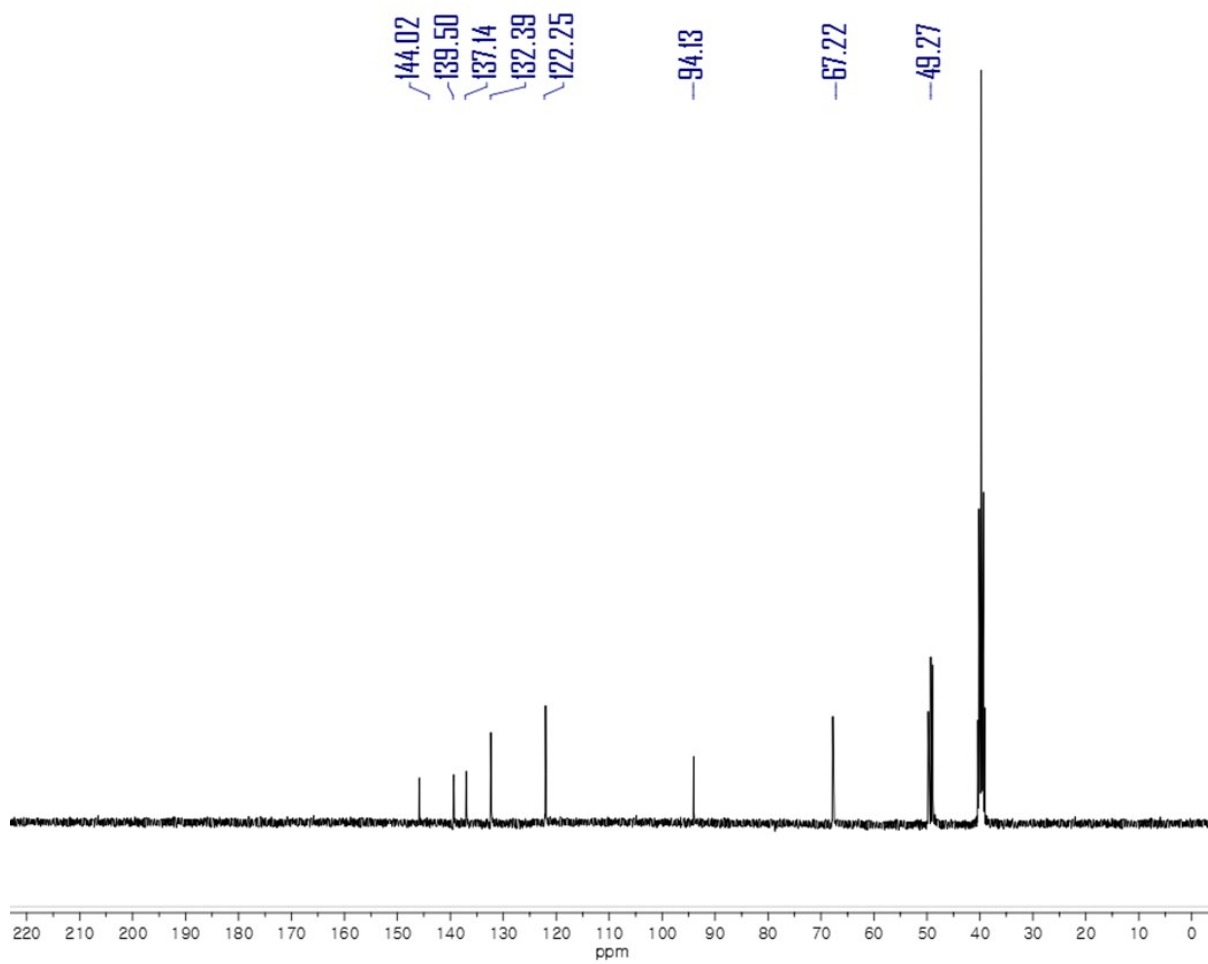

**Fig. S3**  $^{13}\text{C}$  NMR spectrum of **1**.

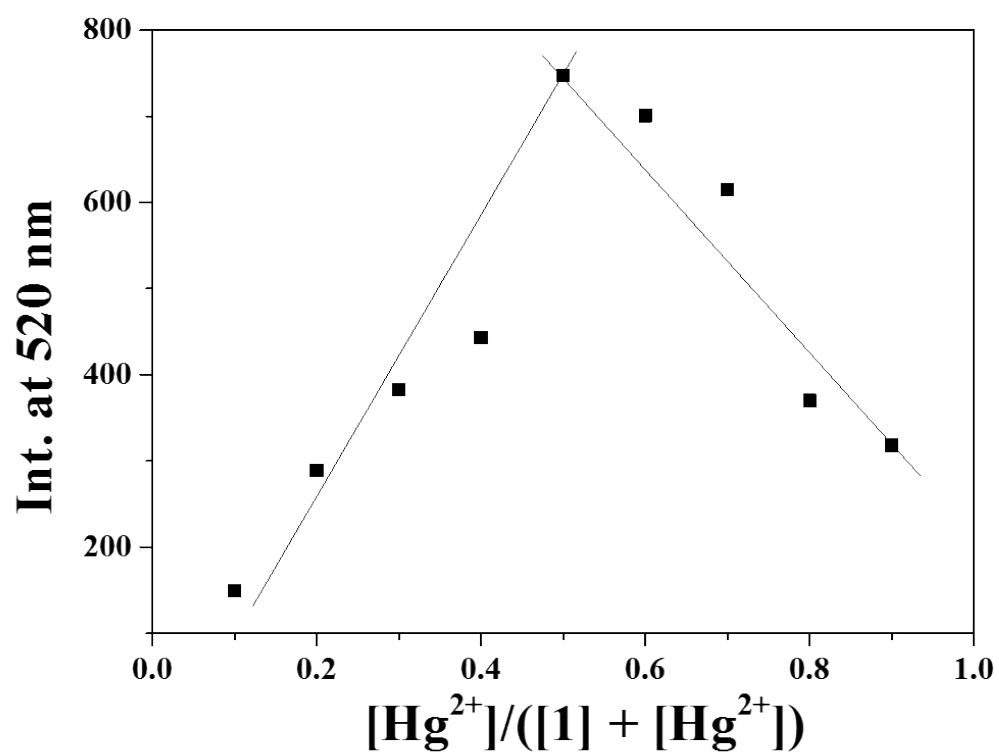

**Fig. S4** Job plot of **1** and Hg<sup>2+</sup>. The total concentrations of **1** and Hg<sup>2+</sup> were 20  $\mu\text{M}$ .

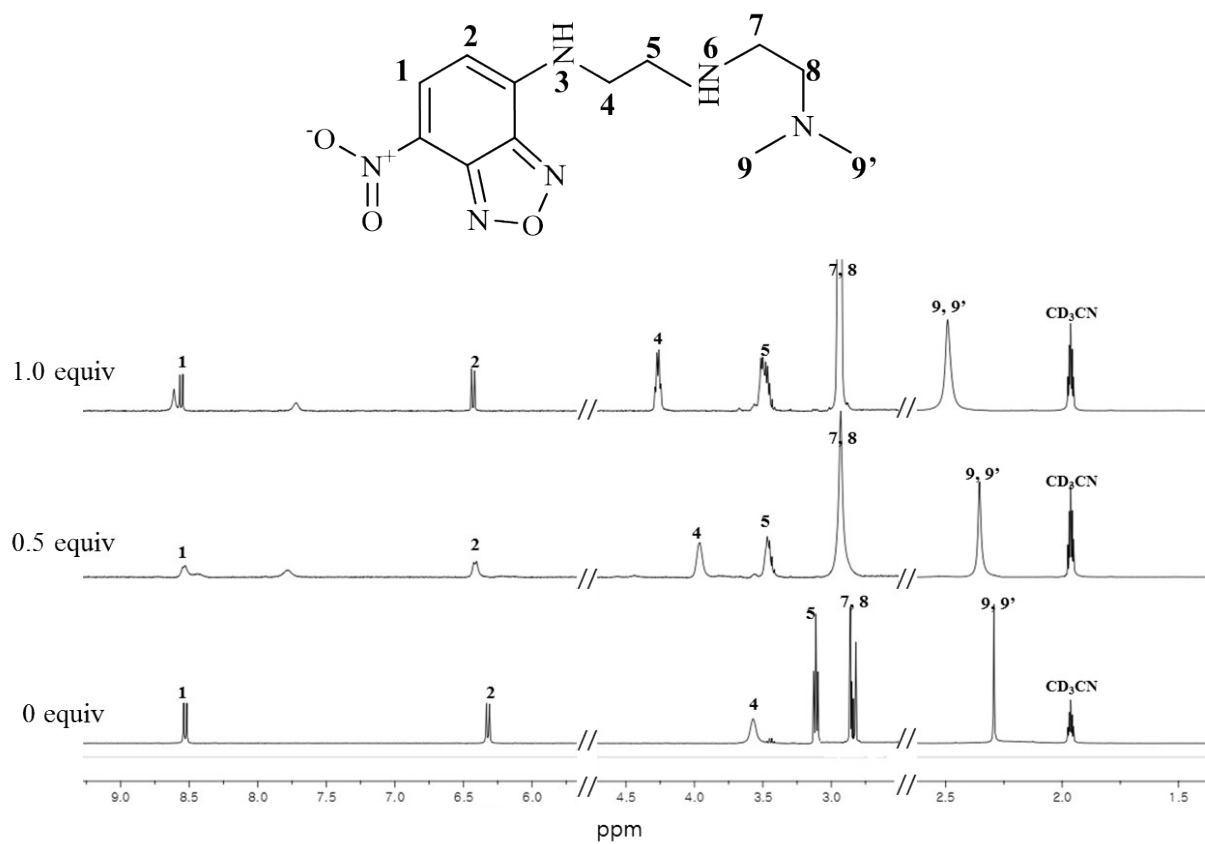

**Fig. S5**  $^1\text{H}$  NMR titration of **1** with  $\text{Hg}^{2+}$  ions.



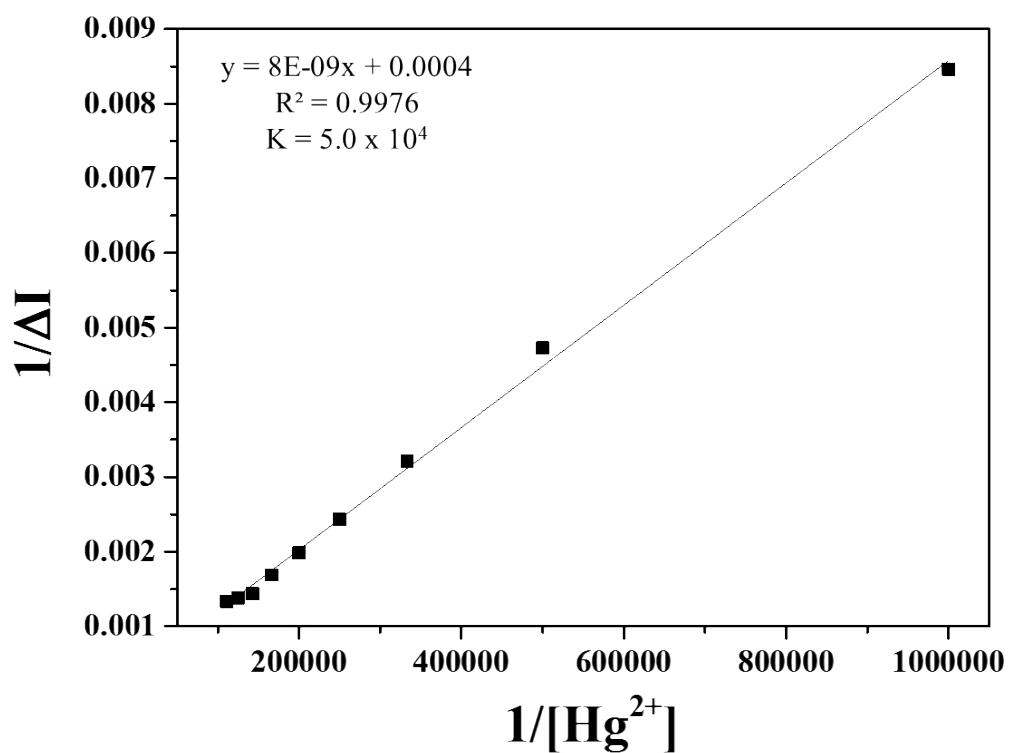

**Fig. S6** Benesi-Hildebrand plot (at 520 nm) of **1** based on fluorescence titration, assuming 1:1 stoichiometry for association between **1** and  $\text{Hg}^{2+}$ .

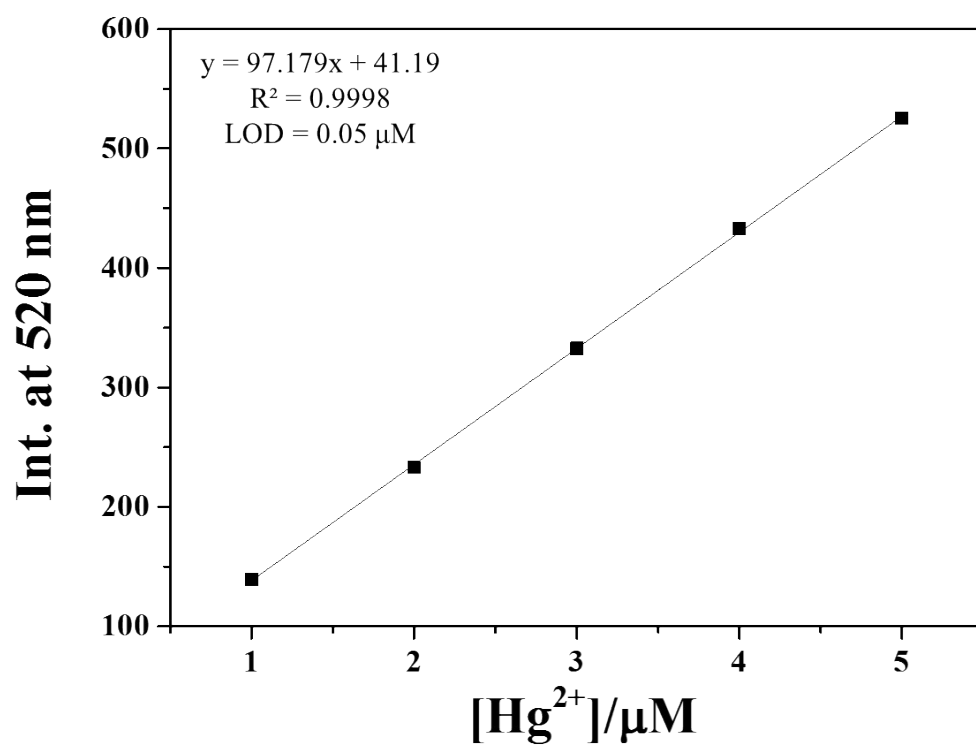

**Fig. S7** Determination of the detection limit based on change in the ratio of **1** ( $5 \mu\text{M}$ ) with  $\text{Hg}^{2+}$ .

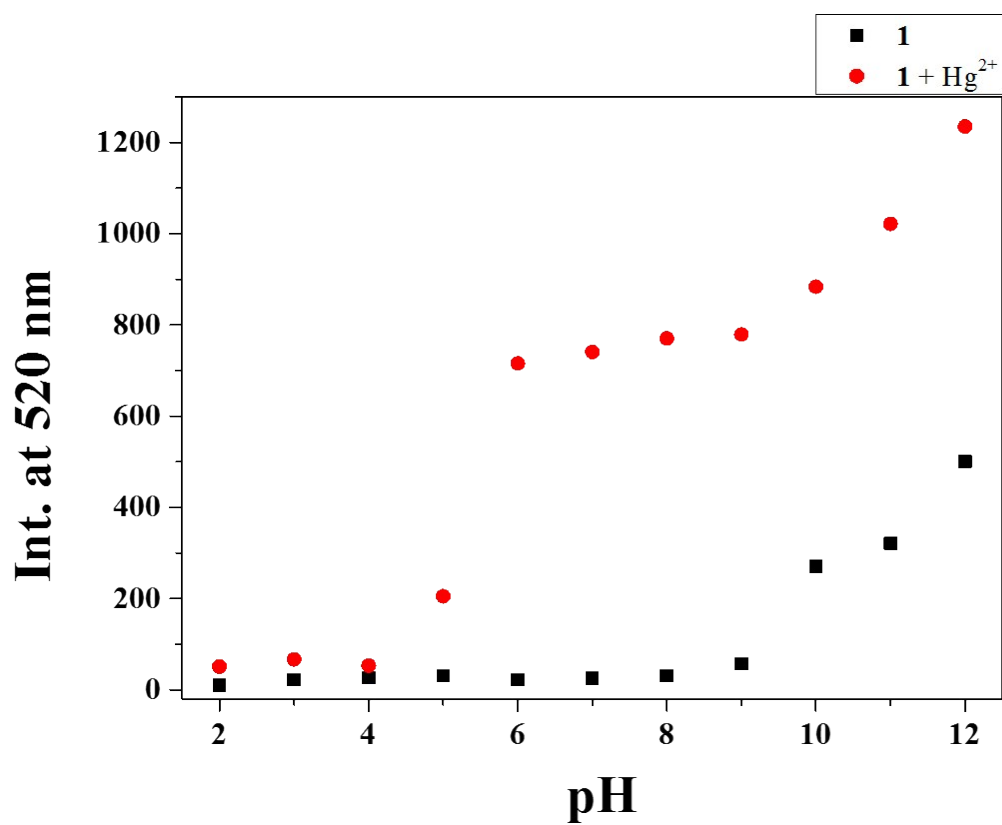

**Fig. S8** Fluorescence intensities (520 nm) of **1** (5  $\mu$ M) and **1**-Hg<sup>2+</sup> complex, respectively, at pH 2-12 in a mixture of buffer-CH<sub>3</sub>CN (7:3, v/v) at room temperature.

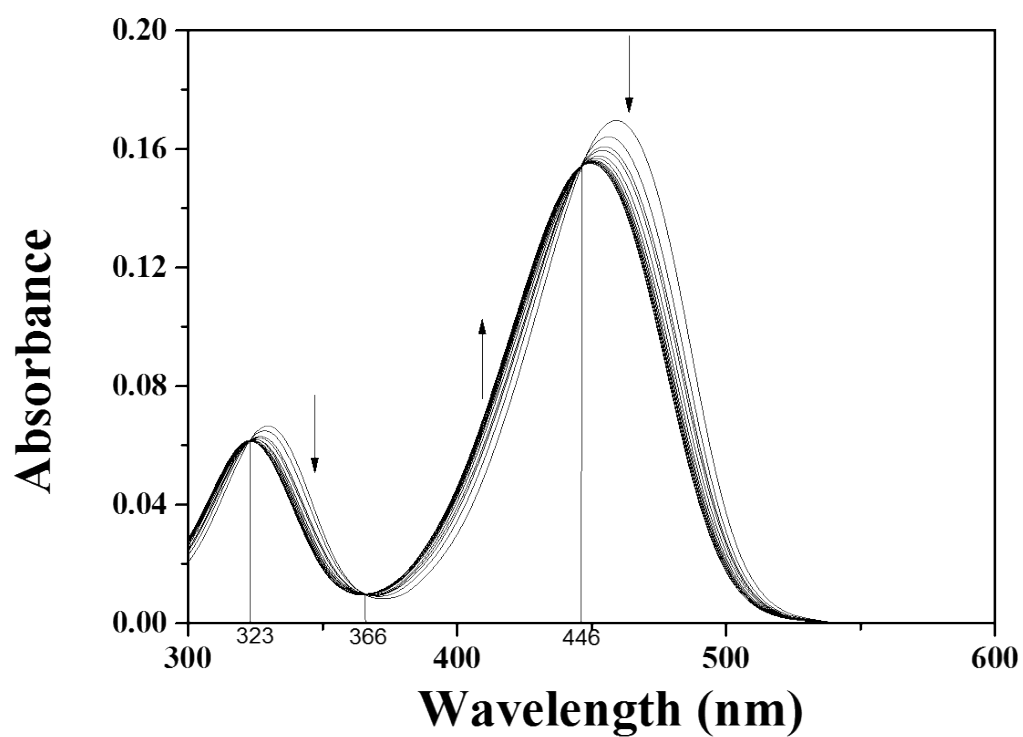

**Fig. S9** Absorption spectral changes of **1** (5 μM) in the presence of different concentrations of Ag<sup>+</sup> ions in a mixture of buffer-CH<sub>3</sub>CN (7:3, v/v) at room temperature.

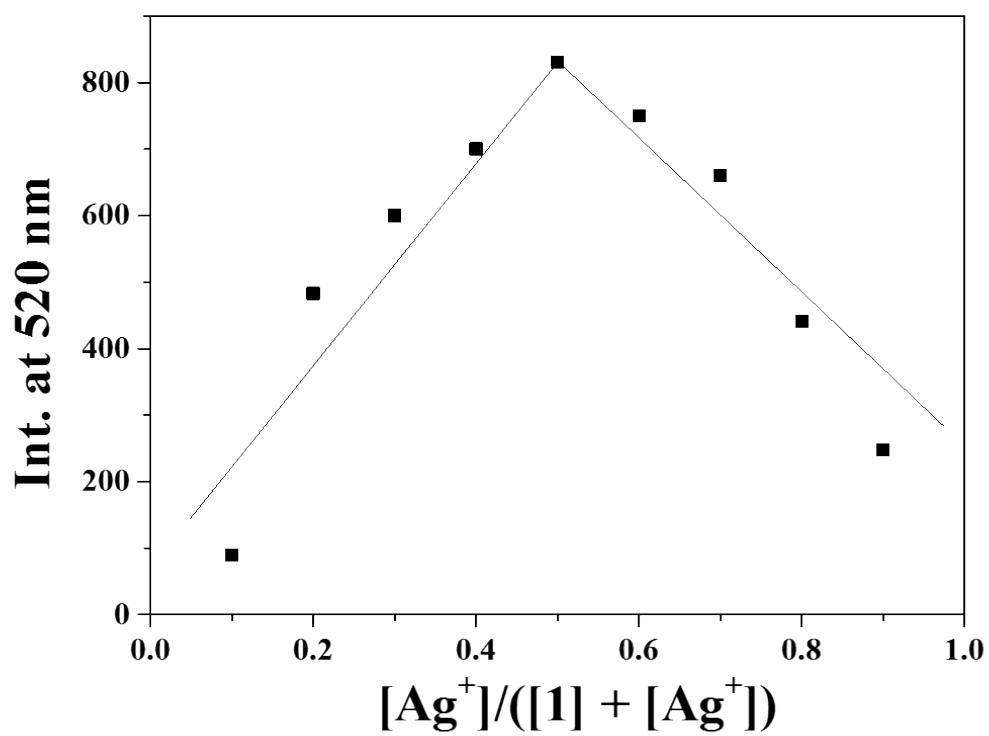

**Fig. S10** Job plot of **1** and Ag<sup>+</sup>. The total concentrations of **1** and Ag<sup>+</sup> were 20 μM.

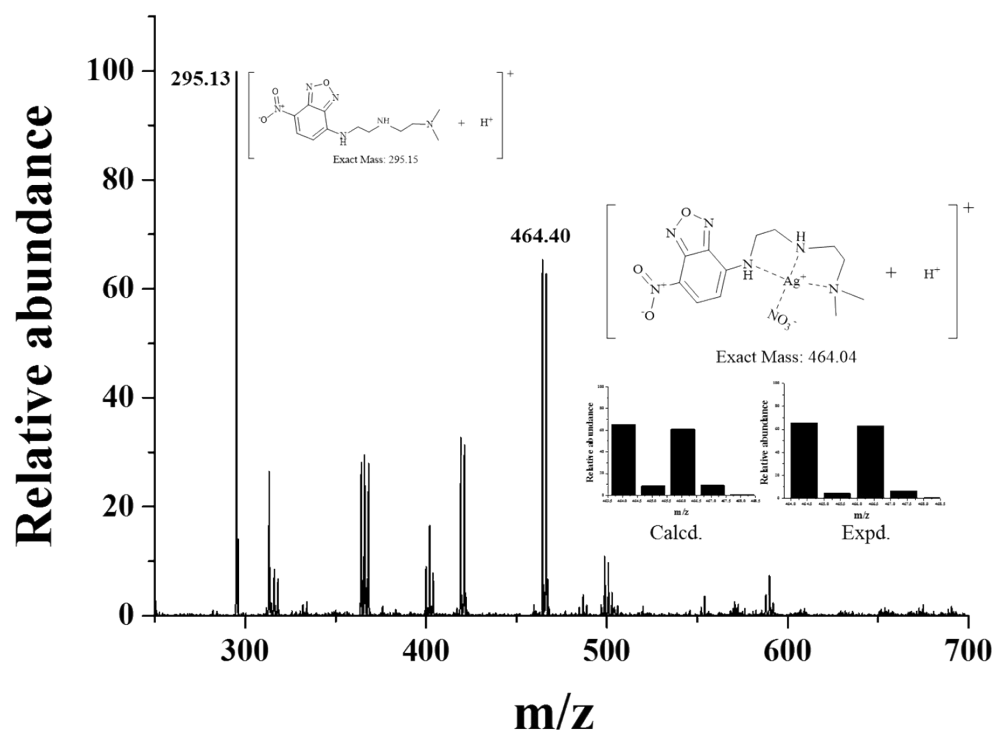

**Fig. S11** Positive-ion electrospray ionization mass spectrum of **1** (10  $\mu$ M) upon addition of  $\text{AgNO}_3$  (1.0 equiv).

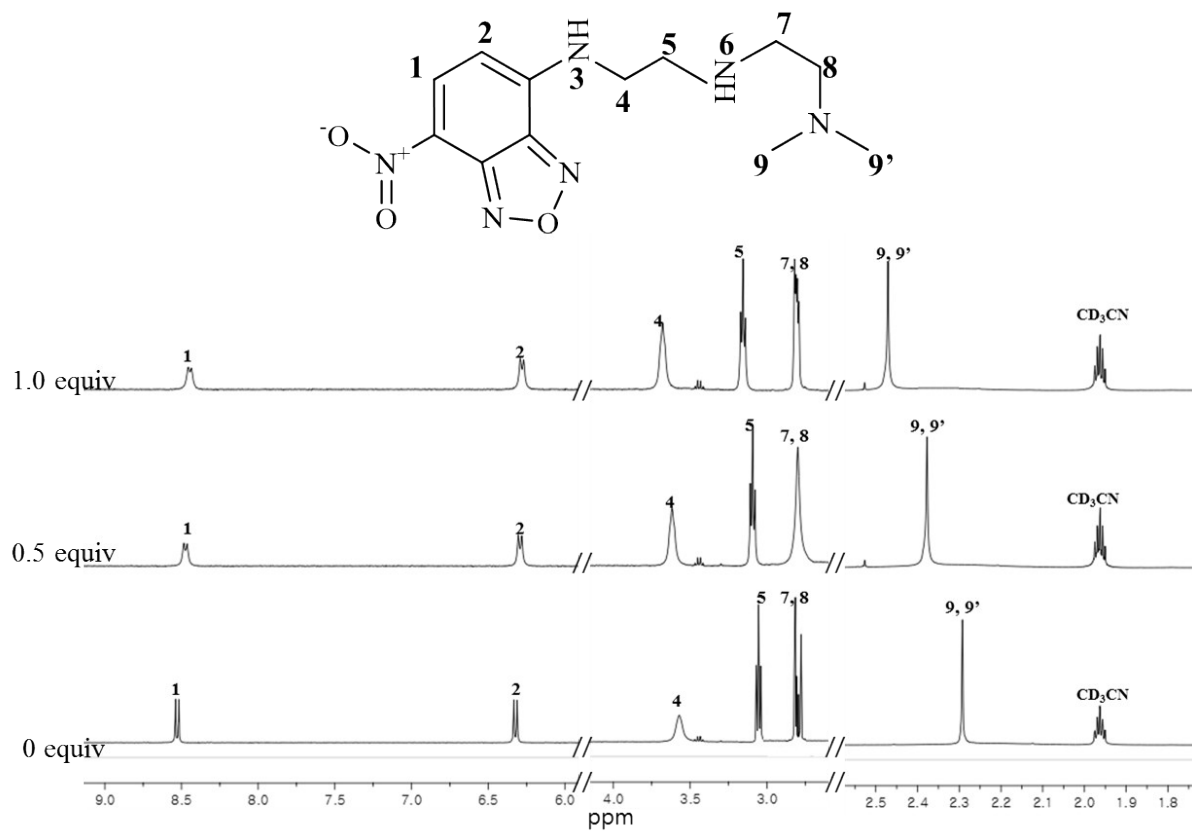

**Fig. S12** <sup>1</sup>H NMR titration of **1** with Ag<sup>+</sup> ions.

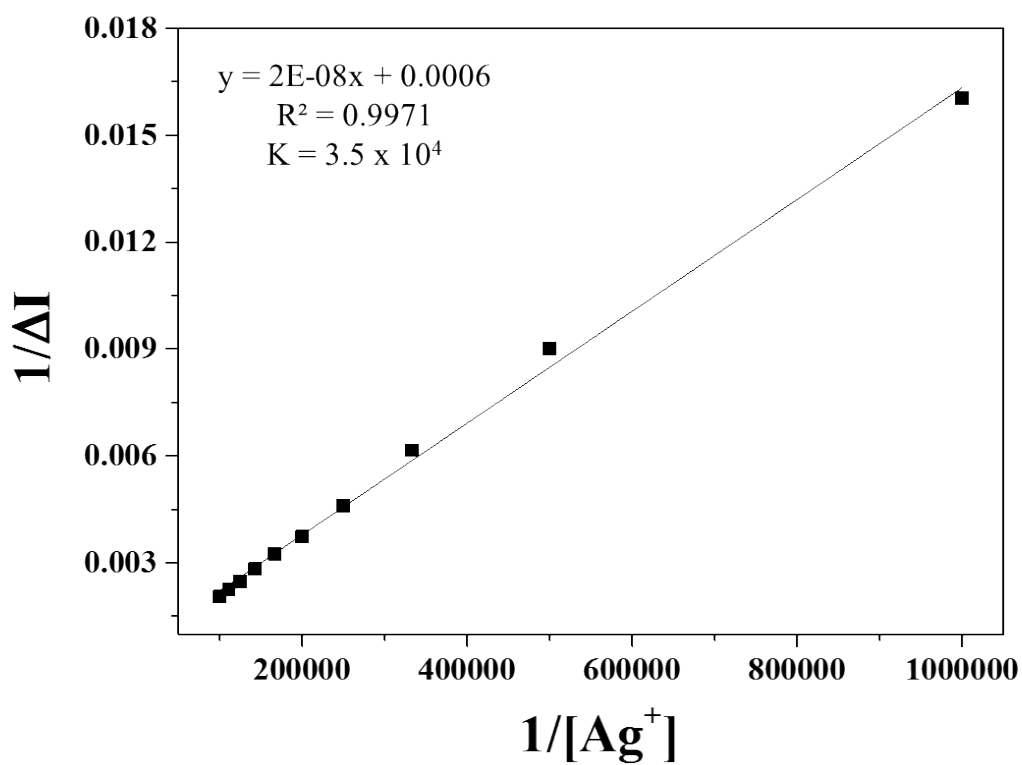

**Fig. S13** Benesi-Hildebrand plot (at 520 nm) of **1** based on fluorescence titration, assuming 1:1 stoichiometry for association between **1** and  $Ag^+$ .



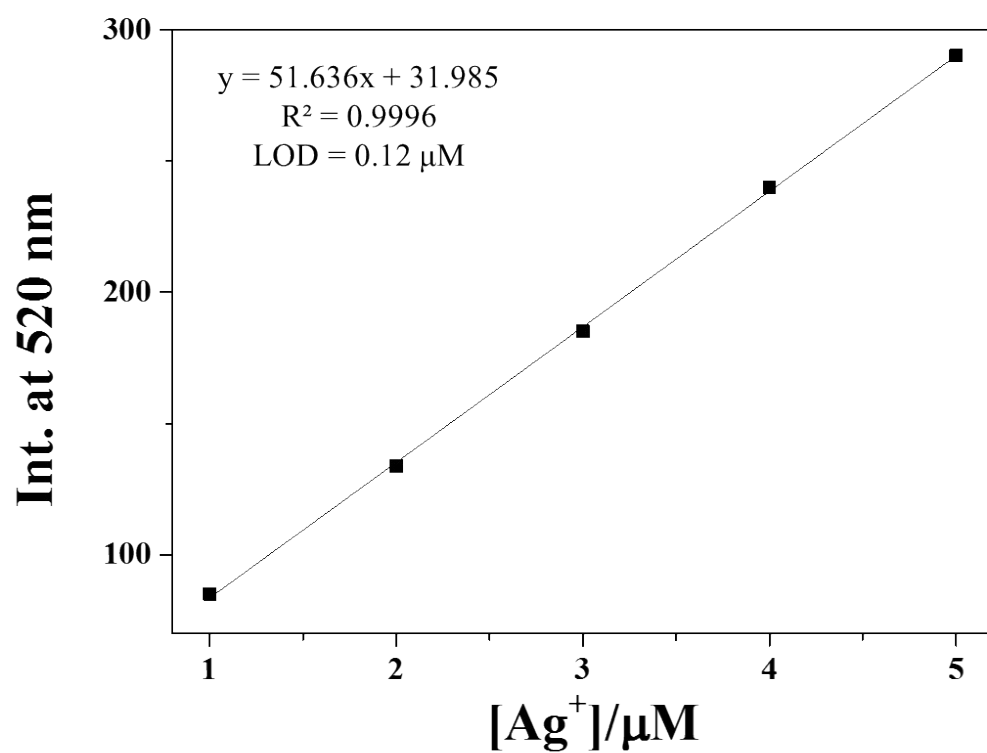

**Fig. S14** Determination of the detection limit based on change in the ratio of 1 (5 μM) with Ag<sup>+</sup>.

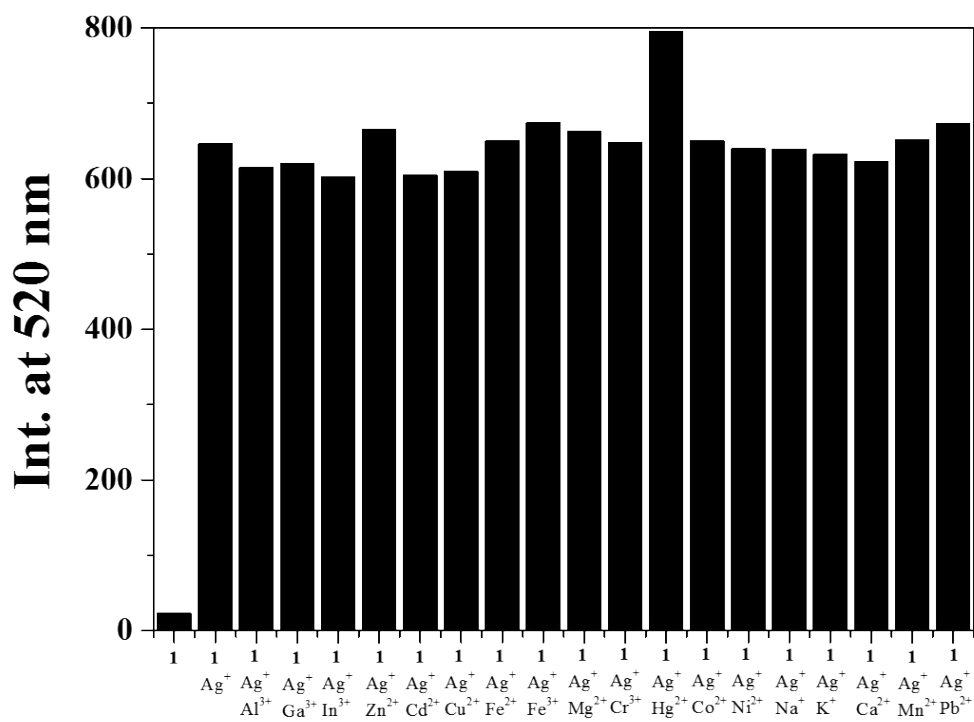

**Fig. S15** Competitive selectivity of **1** (5  $\mu\text{M}$ ) toward  $\text{Ag}^+$  (2.6 equiv) in the presence of other metal ions (2.6 equiv).

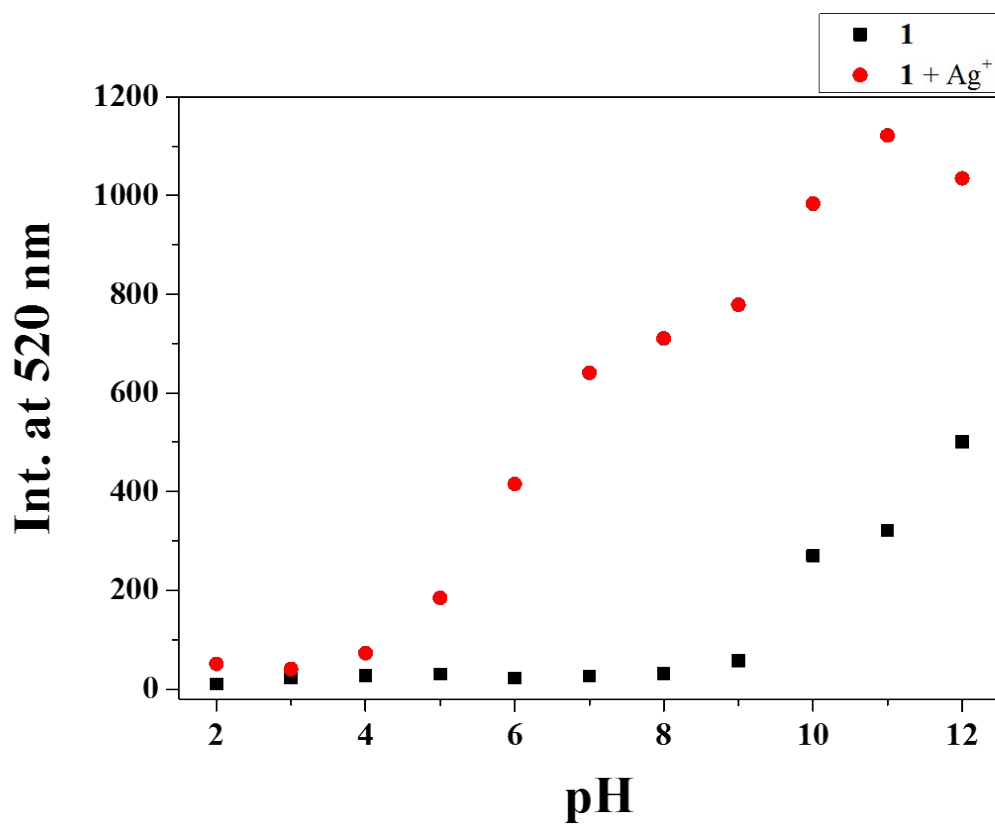

**Fig. S16** Fluorescence intensities (520 nm) of **1** (5  $\mu\text{M}$ ) and **1**- $\text{Ag}^+$  complex, respectively, at pH 2-12 in a mixture of buffer- $\text{CH}_3\text{CN}$  (7:3, v/v) at room temperature.

(a)

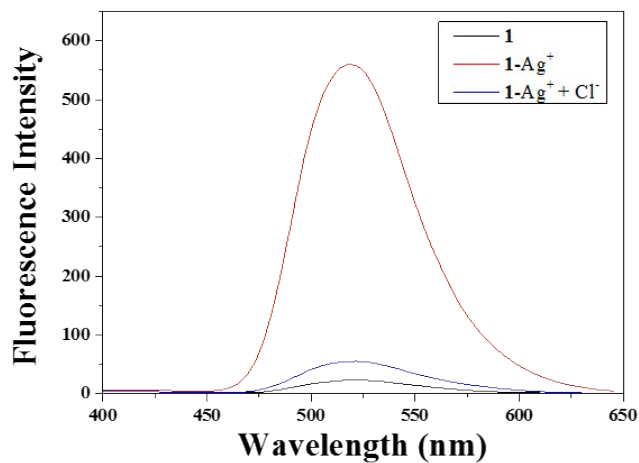

(b)

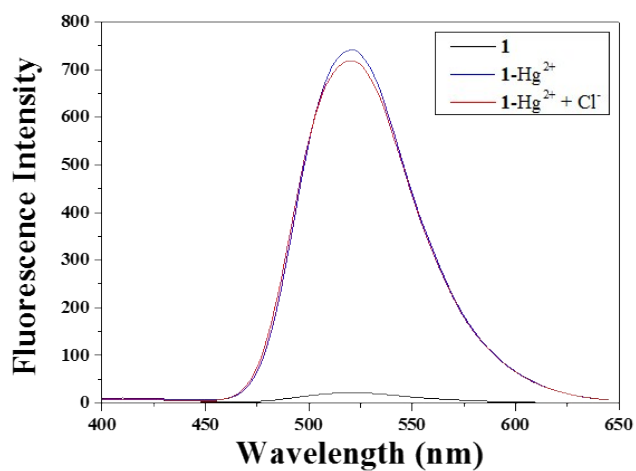

**Fig. S17** Fluorescence spectral changes of **1** (5 μM) after the sequential addition of (a) Ag<sup>+</sup> and Cl<sup>-</sup>, and (b) Hg<sup>2+</sup> and Cl<sup>-</sup>.

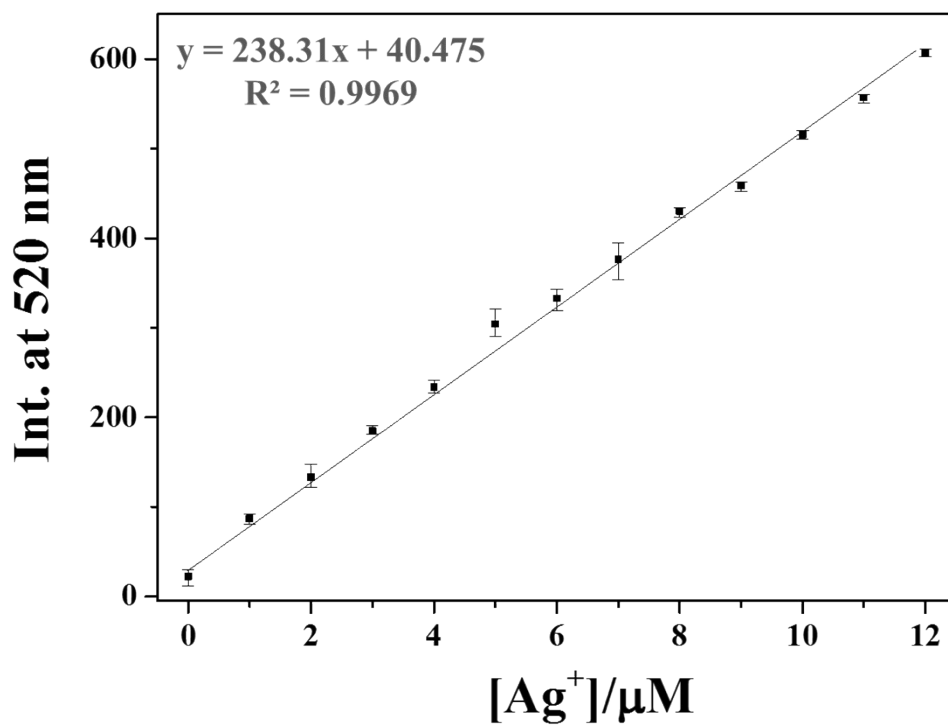

**Fig. S18** Emission intensity (520 nm) of **1** as a function of Ag<sup>+</sup> concentration. [**1**] = 5 µmol/L and [Ag<sup>+</sup>] = 0.0-12.0 µmol/L in buffer-CH<sub>3</sub>CN mixture (7:3, v/v).

(a)

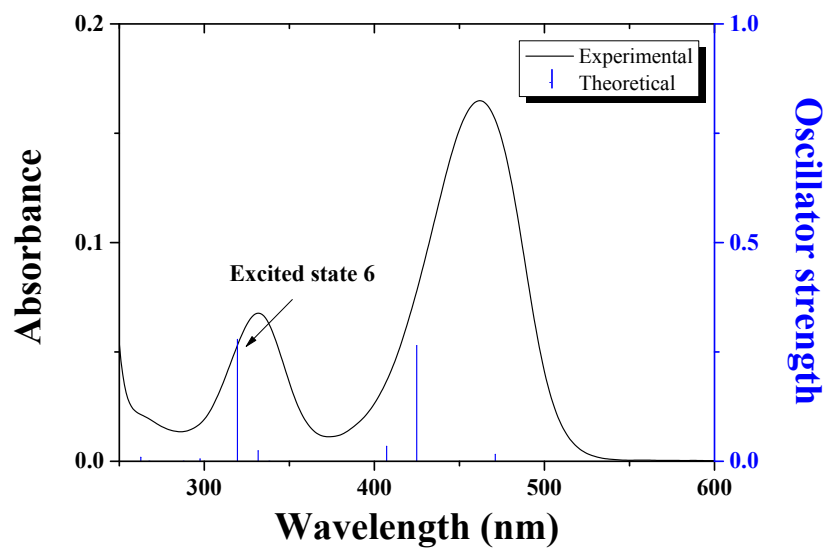

(b)

| Excited state 6           | Wavelength (nm) | Percent (%) | Main character | Oscillator strength |
|---------------------------|-----------------|-------------|----------------|---------------------|
| H - 1 $\rightarrow$ L + 1 | 319.45          | 93          | PET            | 0.2788              |

**Fig. S19** (a) The theoretical excitation energies and the experimental UV-vis spectrum of **1**. (b) The major electronic transition energies and molecular orbital contributions for **1** (H = HOMO and L = LUMO).

(a)

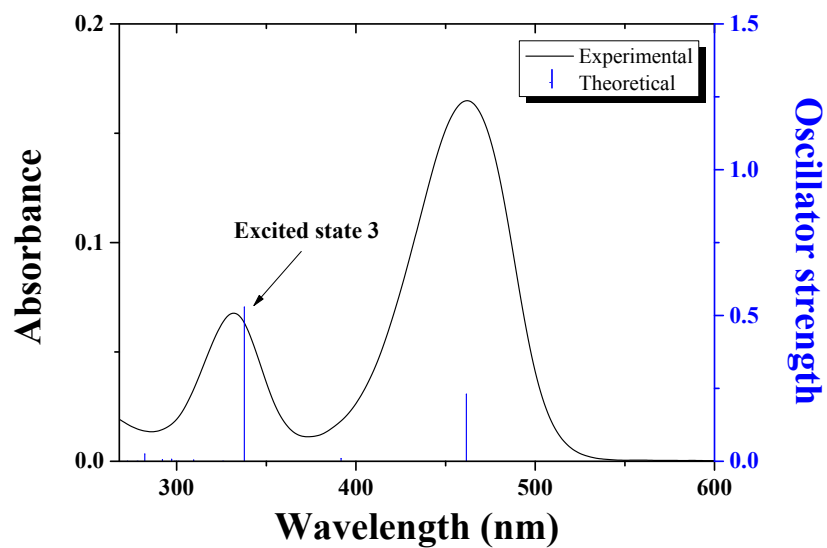

(b)

| Excited state 3       | Wavelength (nm) | Percent (%) | Main character                         | Oscillator strength |
|-----------------------|-----------------|-------------|----------------------------------------|---------------------|
| H $\rightarrow$ L + 2 | 337.73          | 83          | Inhibited PET, $\pi \rightarrow \pi^*$ | 0.5289              |

**Fig. S20** (a) The theoretical excitation energies and the experimental UV-vis spectrum of **1-Hg<sup>2+</sup>**. (b) The major electronic transition energies and molecular orbital contributions for **1-Hg<sup>2+</sup>** (H = HOMO and L = LUMO).

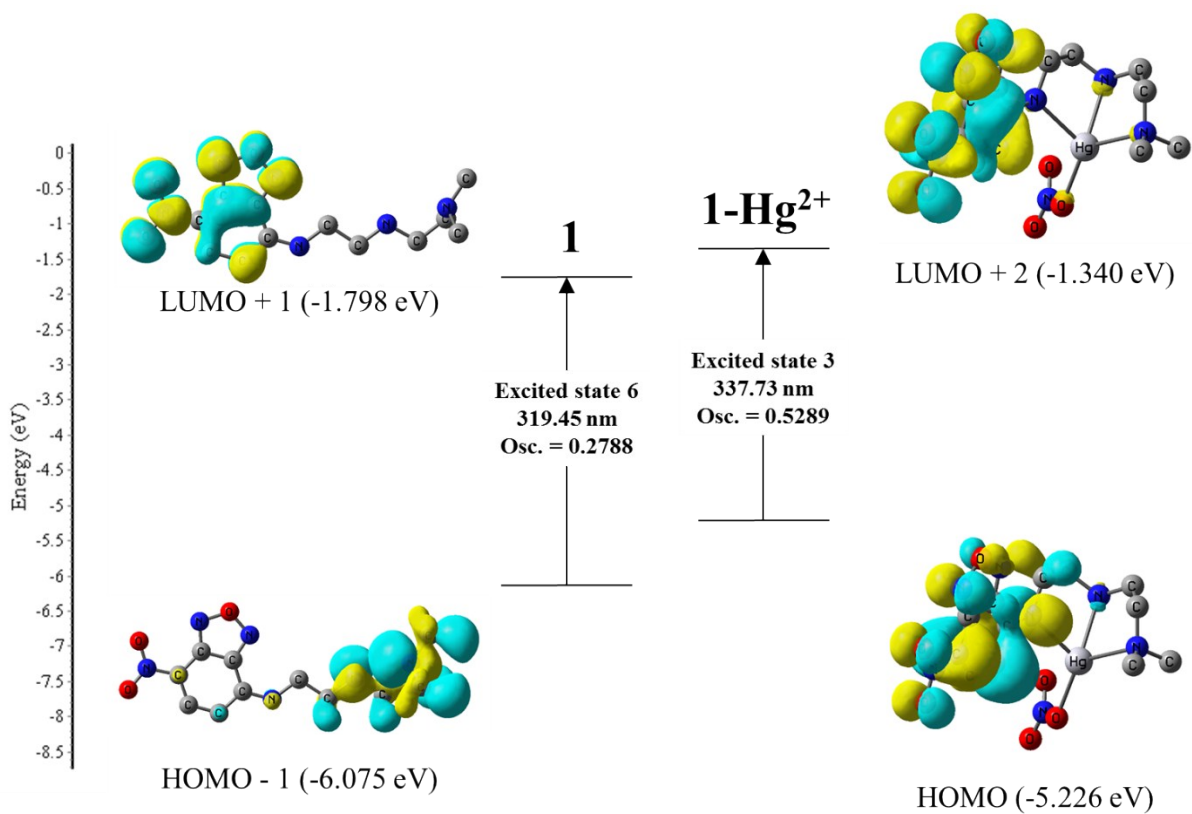

**Fig. S21** Molecular orbital diagrams and excitation energies of **1** and **1-Hg<sup>2+</sup>** complex.



(a)

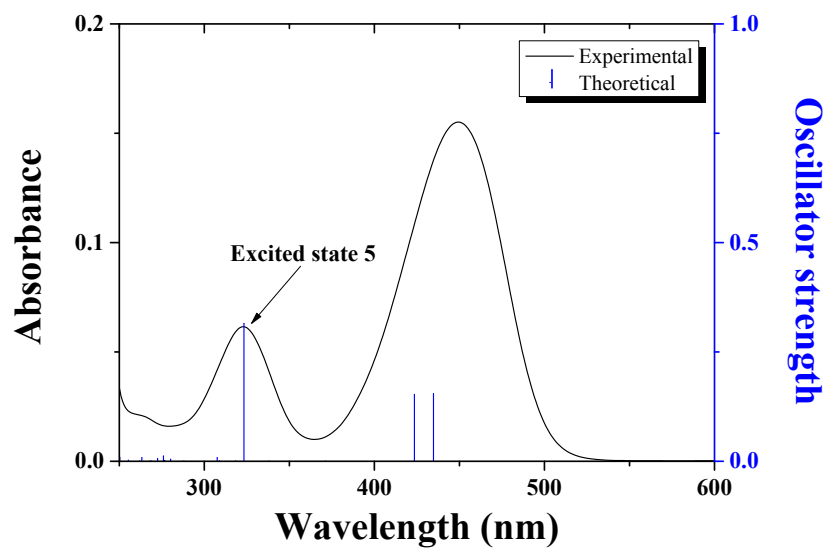

(b)

| Excited state 5 | Wavelength (nm) | Percent (%) | Main character                         | Oscillator strength |
|-----------------|-----------------|-------------|----------------------------------------|---------------------|
| H → L + 1       | 323.28          | 94          | Inhibited PET, $\pi \rightarrow \pi^*$ | 0.3149              |

**Fig. S22** (a) The theoretical excitation energies and the experimental UV-vis spectrum of 1-Ag<sup>+</sup>. (b) The major electronic transition energies and molecular orbital contributions for 1-Ag<sup>+</sup> (H = HOMO and L = LUMO).

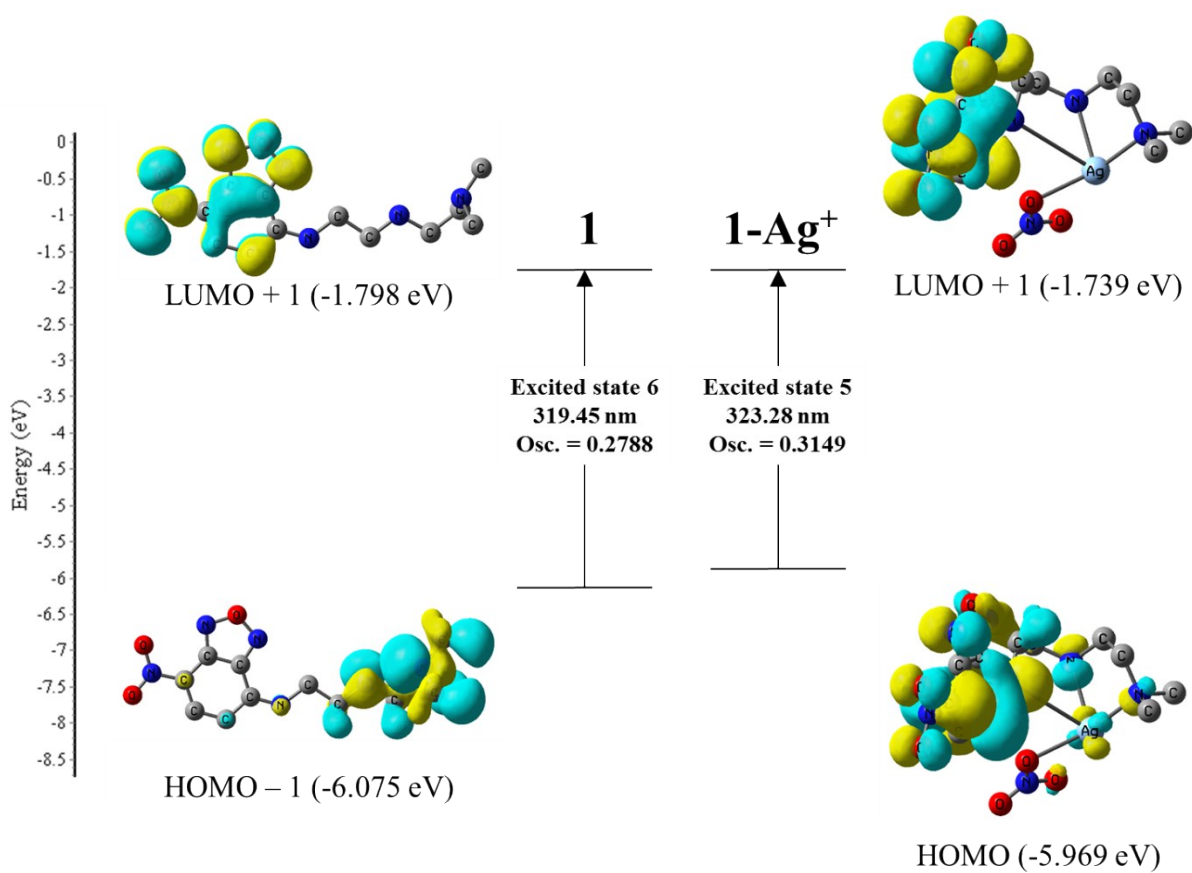

**Fig. S23** Molecular orbital diagrams and excitation energies of **1** and **1-Ag<sup>+</sup>** complex.
